# Supplementary material for: Targeted Isolation of Tsitsikammamines from the Antarctic Deep-Sea Sponge Latrunculia biformis by Molecular Networking and Anticancer Activity
Source: MDPI journal article supplement (doi:10.3390/md16080268), 2018-08-02
Supplement: s1 [file s1]

## SUPPLEMENTARY MATERIALS

# Targeted Isolation of Tsitsikammamines from the Antarctic Deep-Sea Sponge *Latrunculia biformis* by Molecular Networking and Anticancer Activity

Fengjie Li <sup>1</sup>, Dorte Janussen <sup>2</sup>, Christian Peifer <sup>3</sup>, Ignacio Pérez-Victoria <sup>4</sup> and Deniz Tasdemir <sup>1,5,\*</sup>

<sup>1</sup> GEOMAR Centre for Marine Biotechnology (GEOMAR-Biotech), Marine Natural Products Research Unit Chemistry, GEOMAR Helmholtz Centre for Ocean Research Kiel, Am Kiel-Kanal 44, 24106 Kiel, Germany; fli@geomar.de

<sup>2</sup> Senckenberg Research Institute and Natural History Museum, Senckenberganlage 25, 60325 Frankfurt, Germany; dorte.janussen@senckenberg.de

<sup>3</sup> Pharmaceutical Chemistry, Kiel University, Gutenbergstraße 76, 24118 Kiel, Germany; cpeifer@pharmazie.uni-kiel.de

<sup>4</sup> Fundación MEDINA, Parque Tecnológico de la Salud, Av. Conocimiento 18016 Granada, Spain; ignacio.perez-victoria@medinaandalucia.es

<sup>5</sup> Faculty of Mathematics and Natural Sciences, Kiel University, Christian-Albrechts-Platz 4, 24118 Kiel, Germany

\* Correspondence: dtasdemir@geomar.de; Tel.: +49-431-600-4430

| Figure No                                                                                                                 | Page No |
|---------------------------------------------------------------------------------------------------------------------------|---------|
| <b>Figure S1.</b> $^1\text{H}$ NMR spectrum of compound <b>1</b> (free base, 600 MHz, DMSO- $d_6$ ).                      | 3       |
| <b>Figure S2.</b> $^{13}\text{C}$ NMR spectrum of compound <b>1</b> (free base, 150 MHz, DMSO- $d_6$ ).                   | 3       |
| <b>Figure S3.</b> HSQC NMR spectrum of compound <b>1</b> (free base, 600 MHz, DMSO- $d_6$ ).                              | 4       |
| <b>Figure S4.</b> HMBC spectrum of compound <b>1</b> (free base, 600 MHz, DMSO- $d_6$ ).                                  | 4       |
| <b>Figure S5.</b> COSY spectrum of compound <b>1</b> (free base, 600 MHz, DMSO- $d_6$ ).                                  | 5       |
| <b>Figure S6.</b> NOESY spectrum of compound <b>1</b> (free base, 600 MHz, DMSO- $d_6$ ).                                 | 5       |
| <b>Figure S7.</b> $^1\text{H}$ NMR spectrum of compound <b>1</b> (free base, 600 MHz, MeOD).                              | 6       |
| <b>Figure S8.</b> $^1\text{H}$ NMR spectrum of compound <b>1</b> (TFA salt, 600 MHz, DMSO- $d_6$ ).                       | 6       |
| <b>Figure S9.</b> $^{13}\text{C}$ NMR spectrum of compound <b>1</b> (TFA salt, 150 MHz, DMSO- $d_6$ ).                    | 7       |
| <b>Figure S10.</b> HR-ESIMS spectrum of compound <b>1</b> .                                                               | 7       |
| <b>Figure S11.</b> $^1\text{H}$ NMR spectrum of compound <b>2</b> (600 MHz, MeOD).                                        | 8       |
| <b>Figure S12.</b> HSQC spectrum of compound <b>2</b> (600 MHz, MeOD).                                                    | 8       |
| <b>Figure S13.</b> HMBC spectrum of compound <b>2</b> (600 MHz, MeOD).                                                    | 9       |
| <b>Figure S14.</b> HMBC spectrum of compound <b>2</b> (500 MHz, MeOD).                                                    | 9       |
| <b>Figure S15.</b> COSY spectrum of compound <b>2</b> (500 MHz, MeOD).                                                    | 10      |
| <b>Figure S16.</b> NOESY spectrum of compound <b>2</b> (500 MHz, MeOD).                                                   | 10      |
| <b>Figure S17.</b> HR-ESIMS spectrum of compound <b>2</b> .                                                               | 11      |
| <b>Figure S18.</b> In vitro activity of crude <i>Latrunculia</i> extract and its SPE fractions against cancer cell lines. | 11      |

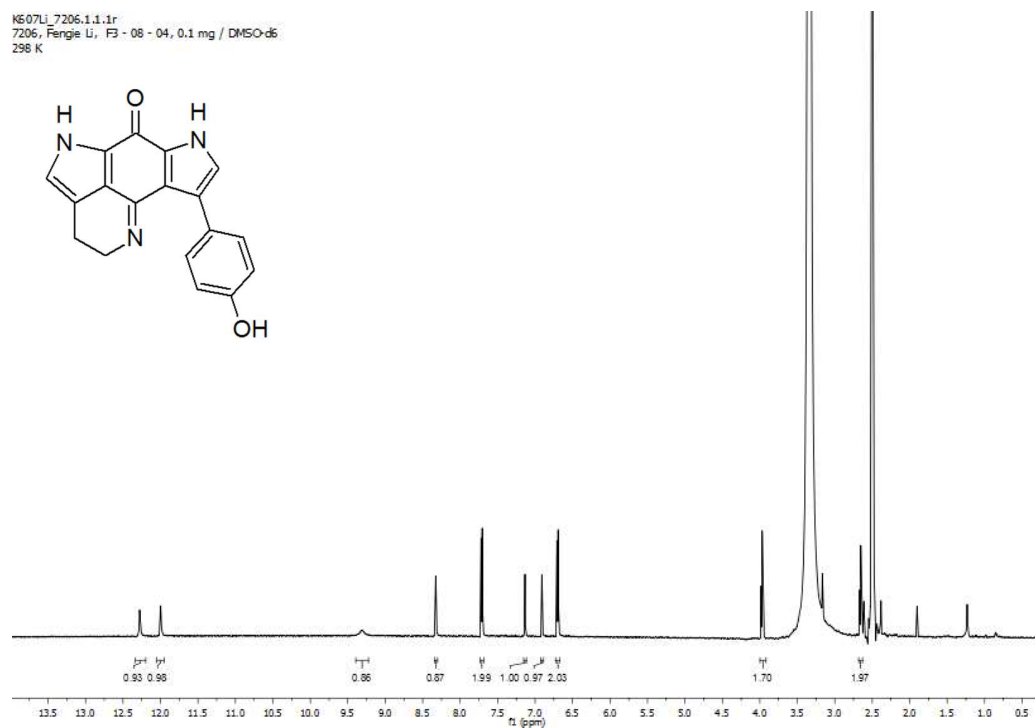

**Figure S1.** <sup>1</sup>H NMR spectrum of compound **1** (free base, 600 MHz, DMSO-*d*<sub>6</sub>).

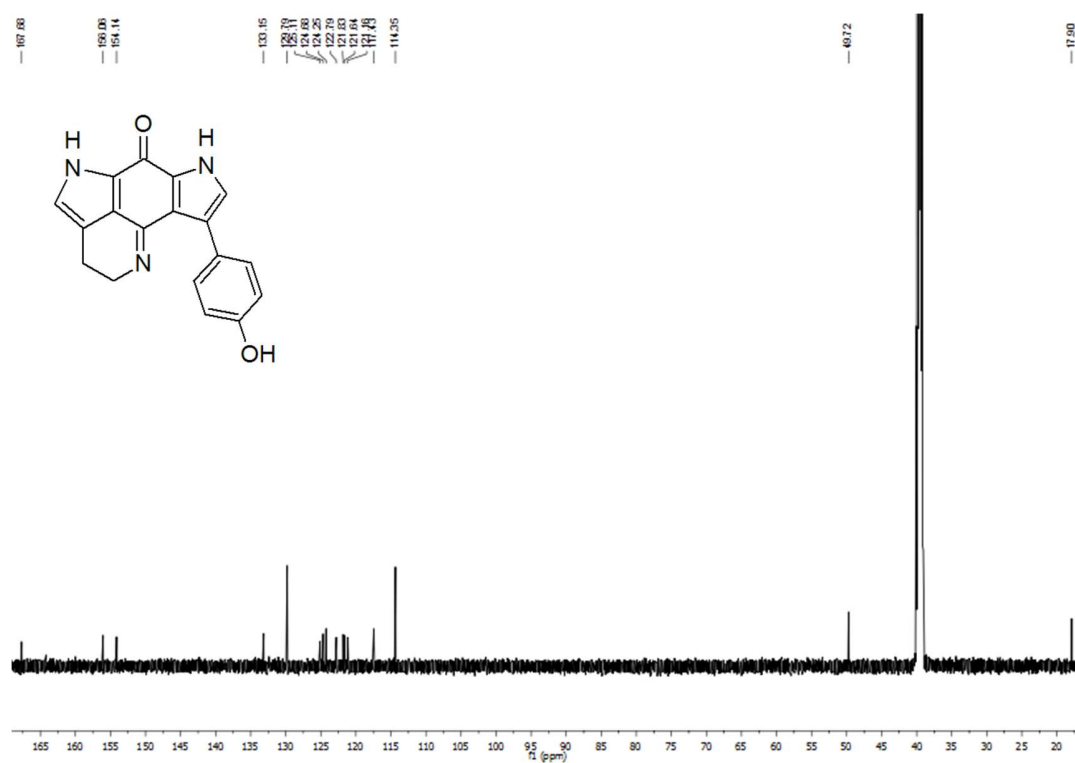

**Figure S2.** <sup>13</sup>C NMR spectrum of compound **1** (free base, 150 MHz, DMSO-*d*<sub>6</sub>).

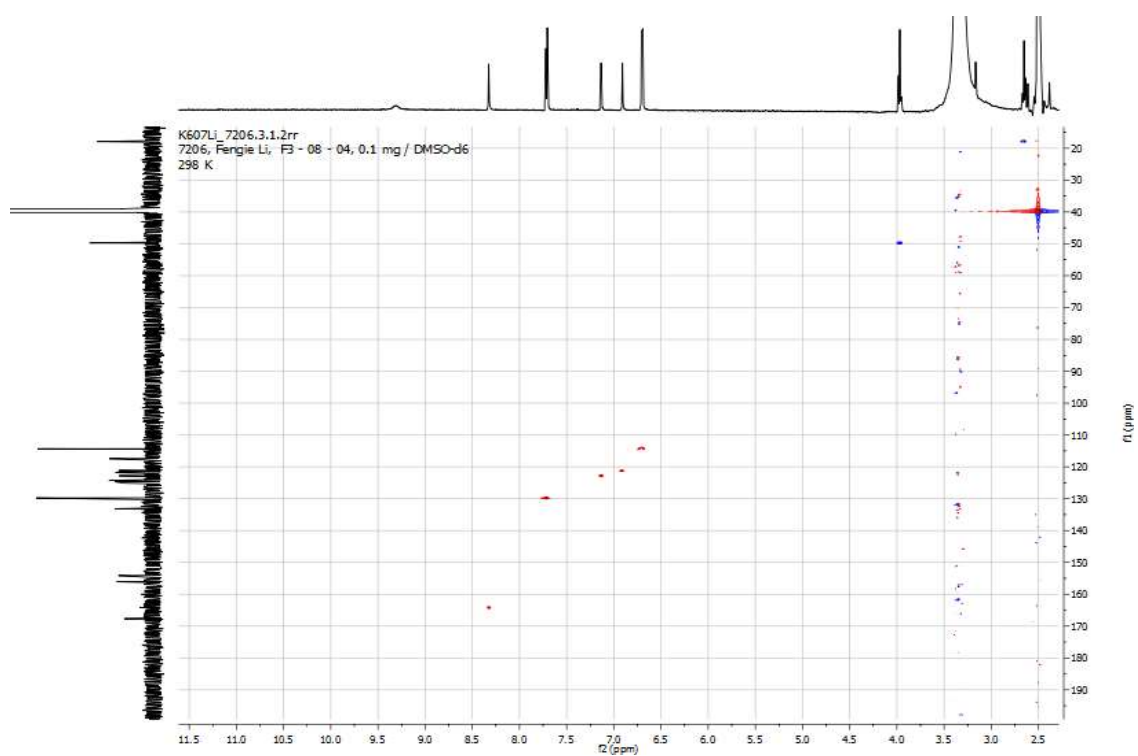

Figure S3. HSQC NMR spectrum of compound **1** (free base, 600 MHz, DMSO-*d*<sub>6</sub>).

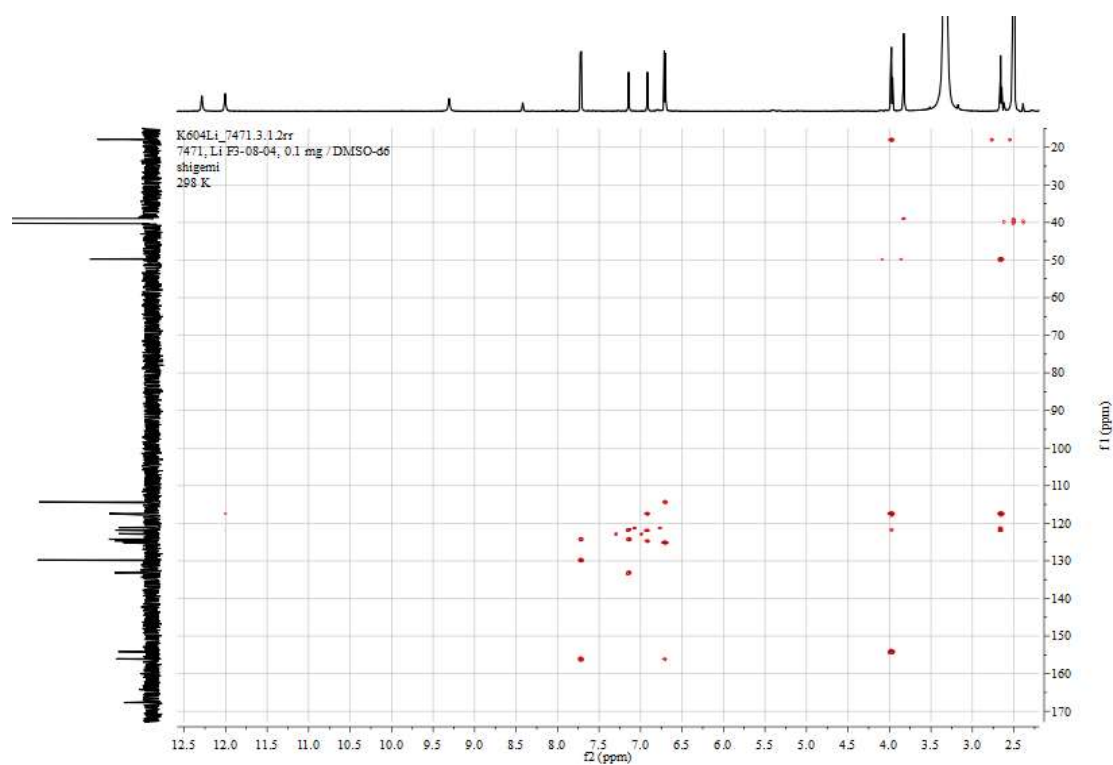

Figure S4. HMBC spectrum of compound **1** (free base, 600 MHz, DMSO-*d*<sub>6</sub>).

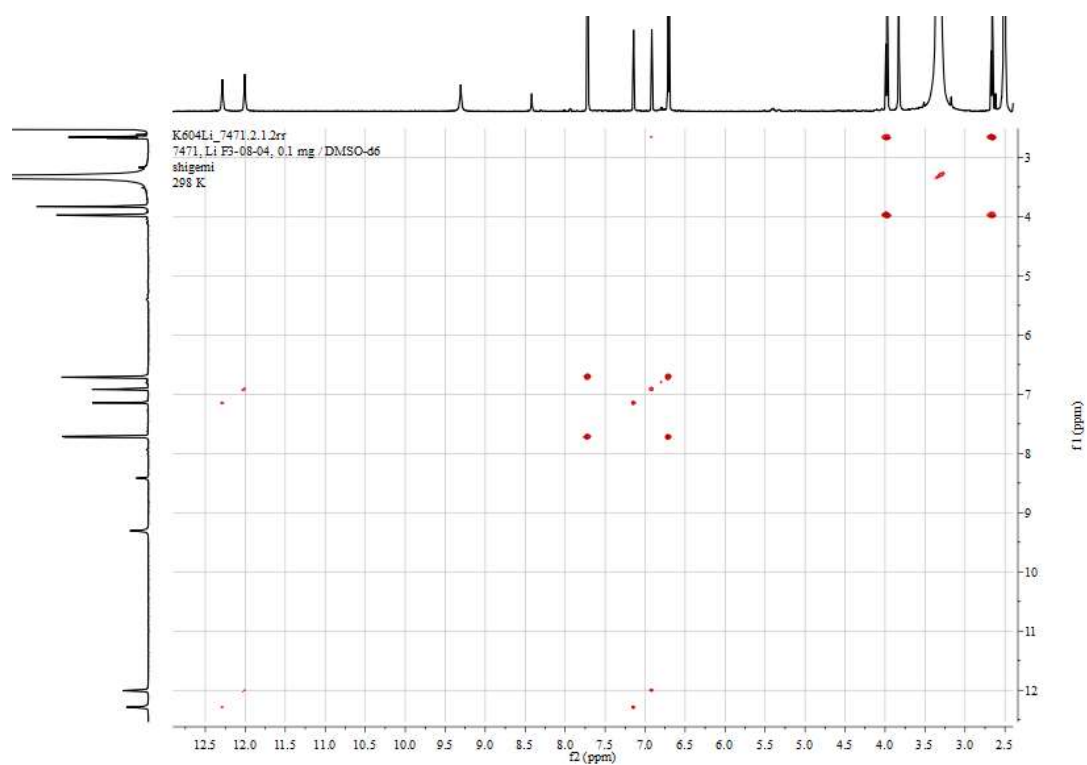

Figure S5. COSY spectrum of compound **1** (free base, 600 MHz, DMSO-*d*<sub>6</sub>).

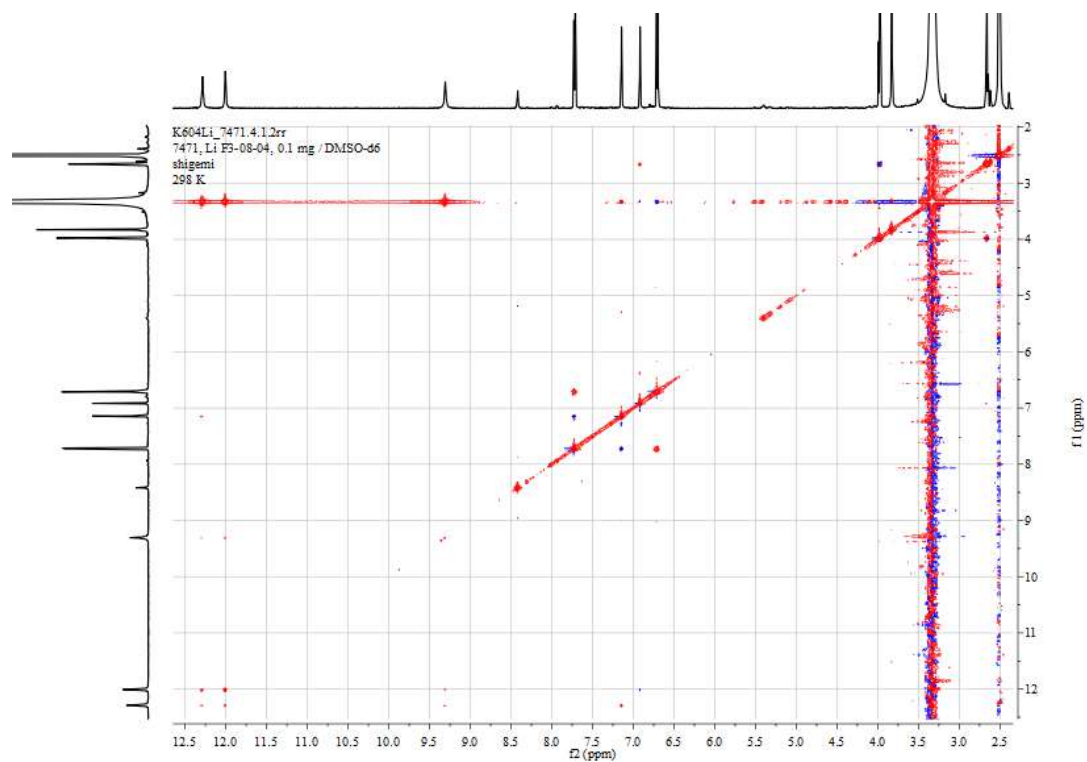

Figure S6. NOESY spectrum of compound **1** (free base, 600 MHz, DMSO-*d*<sub>6</sub>).

K607Li\_7204.1.1.1r  
7204, Fengjie Li, F3 - 08 - 04, 0.1 mg/CD3OD  
298 K

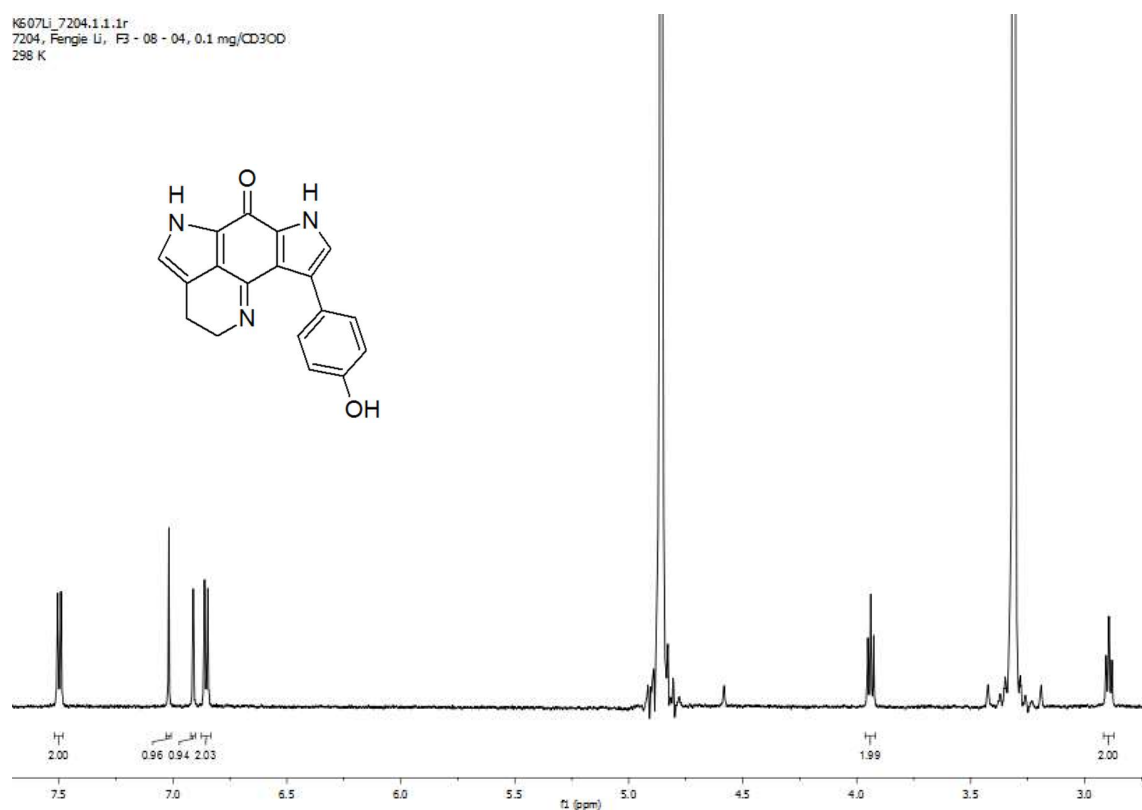

**Figure S7.** <sup>1</sup>H NMR spectrum of compound 1 (free base, 600 MHz, MeOD).

20180406-10-K504Li\_6943.1.1.1r  
Position 10, Mitarbeiter Fengjie Li, Sample F3-08-04, Menge 0.1 mg / DMSO-d6, Re kein

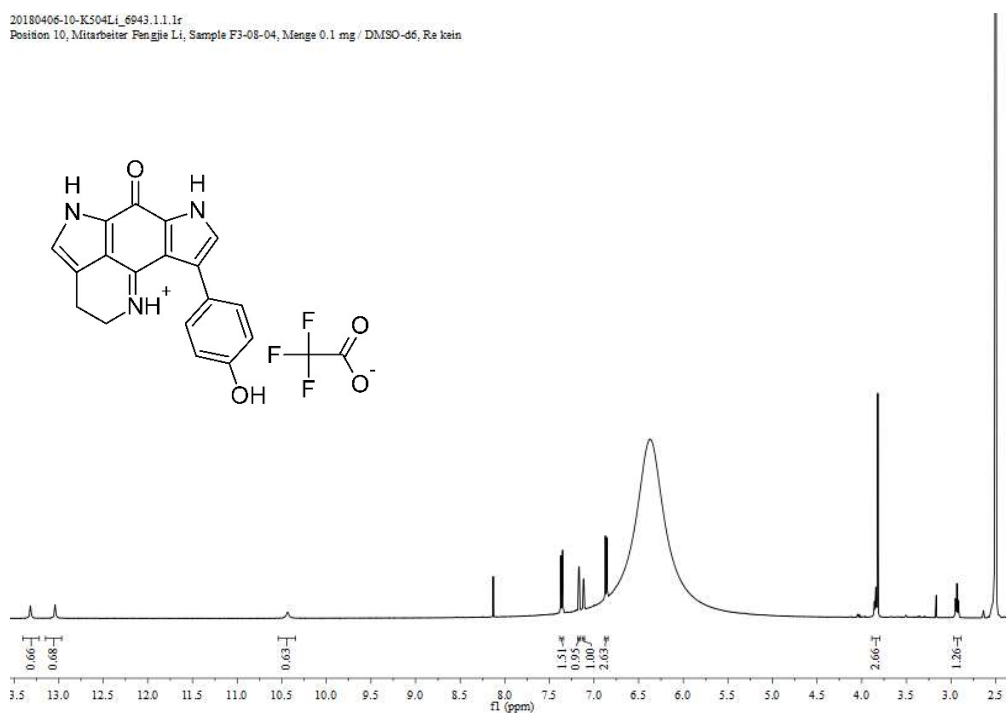

**Figure S8.** <sup>1</sup>H NMR spectrum of compound 1 (TFA salt, 600 MHz, DMSO-d<sub>6</sub>).

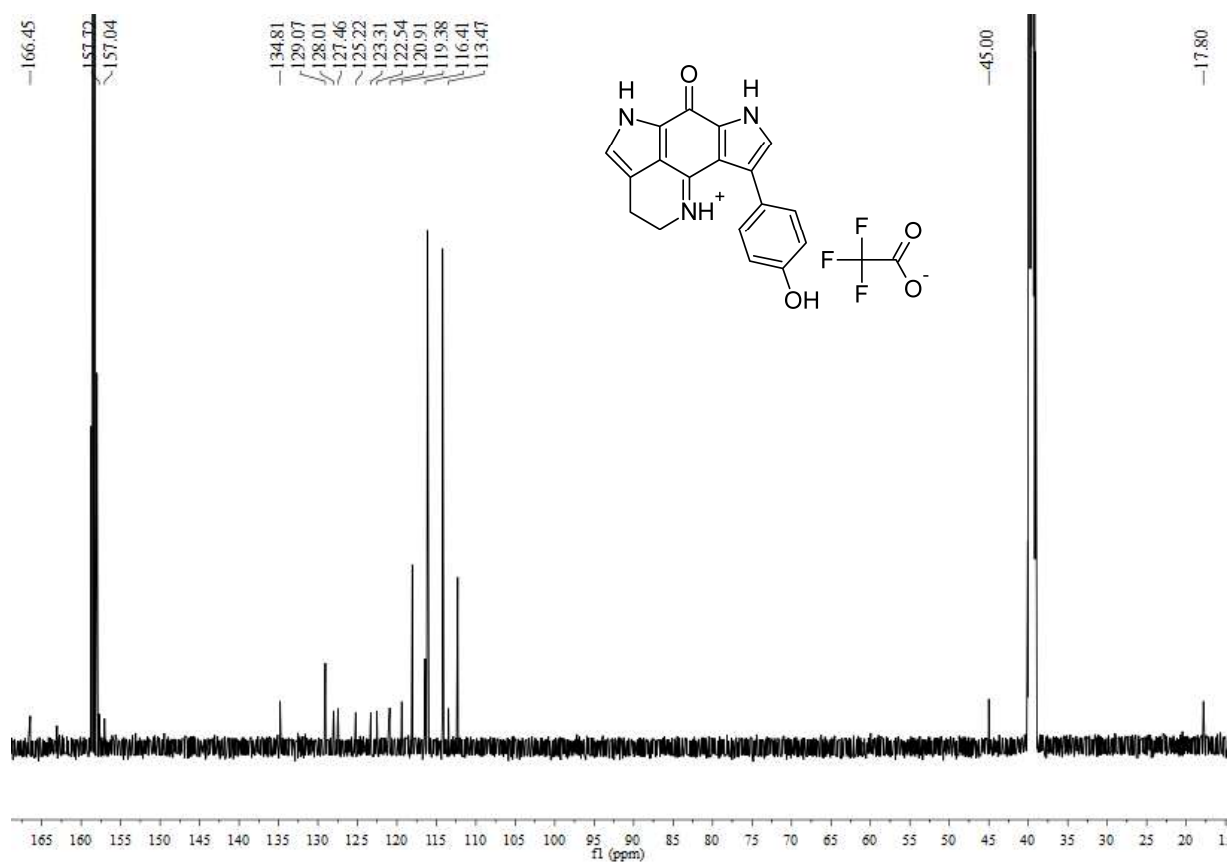

**Figure S9.** <sup>13</sup>C NMR spectrum of compound **1** (TFA salt, 150 MHz, DMSO-*d*<sub>6</sub>).

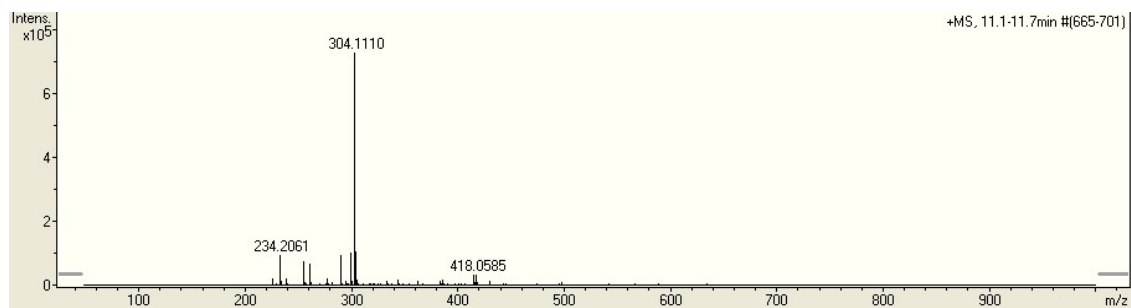

**Figure S10.** HR-ESIMS spectrum of compound **1**.

F3-08-03-CD3OD.1.1.1r  
7222 Fengie Li F3-08-03, 0.1 mg / CD3OD, Shigemii-tube  
298 K

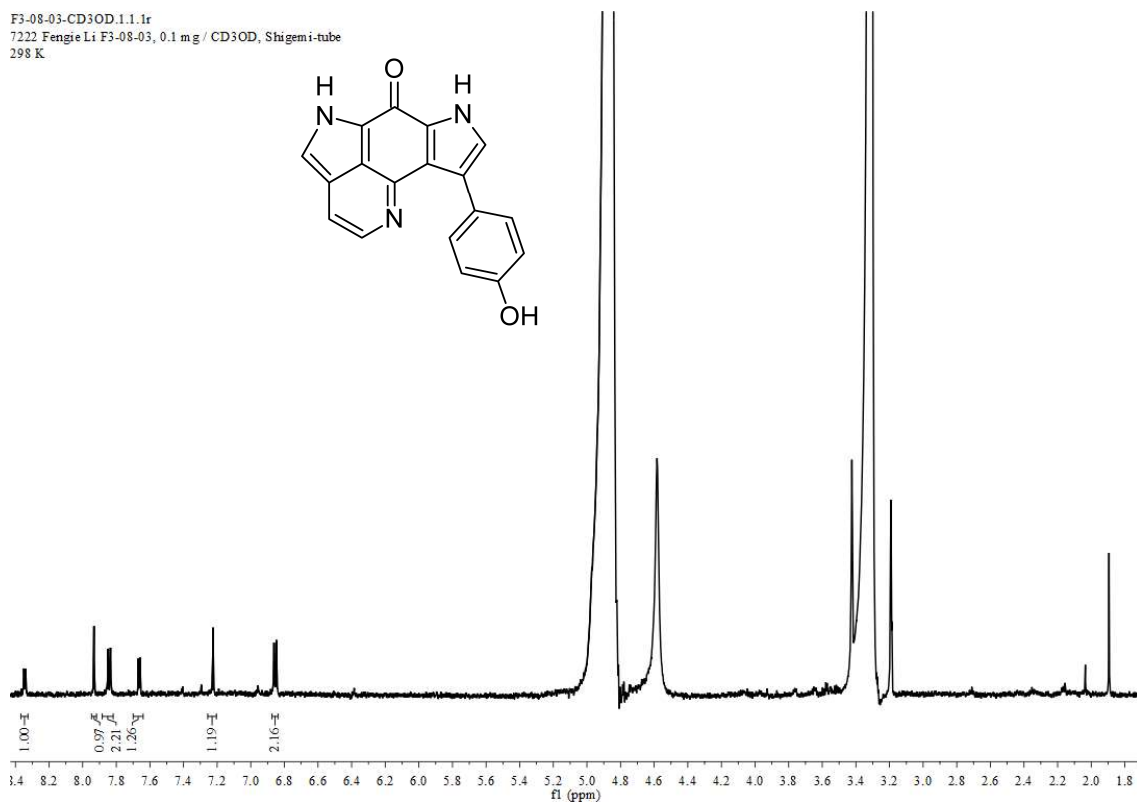

Figure S11.  $^1\text{H}$  NMR spectrum of compound 2 (600 MHz, MeOD).

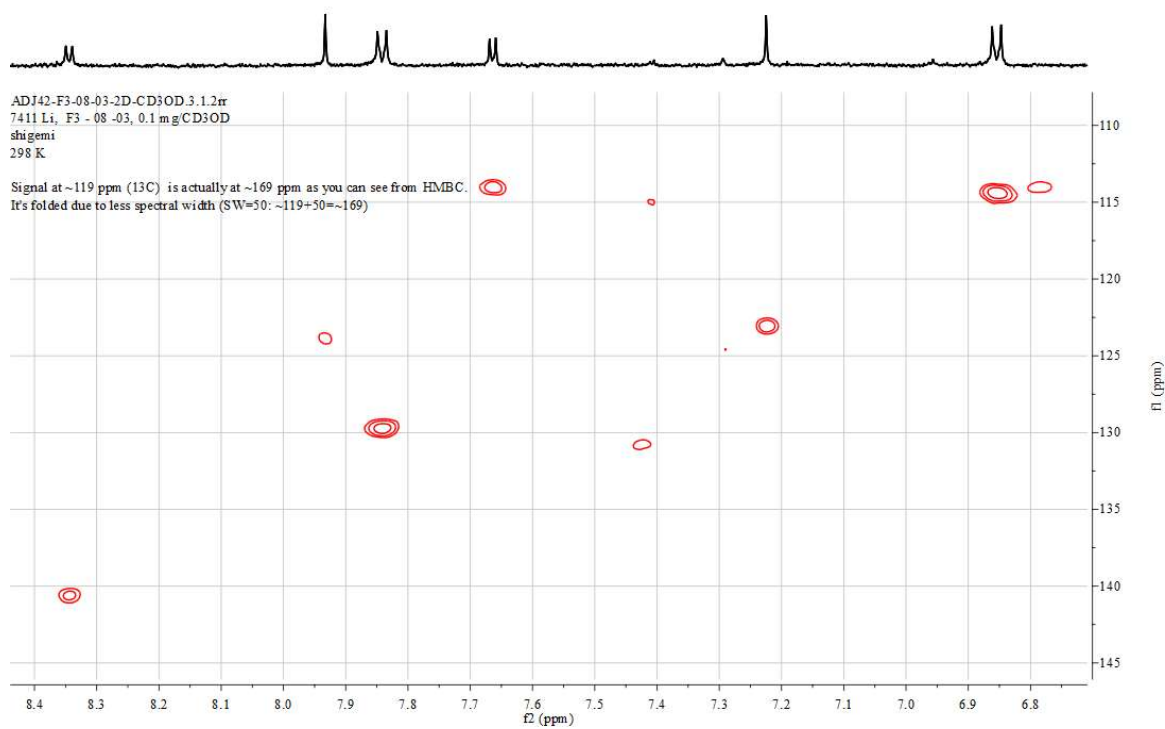

Figure S12. HSQC spectrum of compound 2 (600 MHz, MeOD).



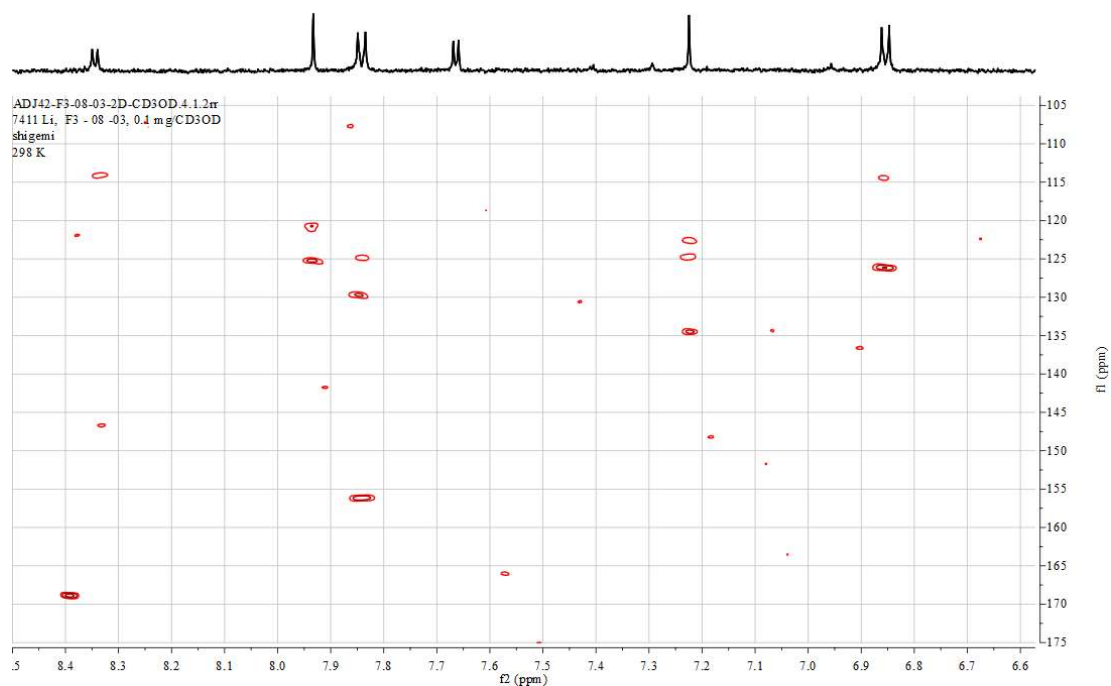

**Figure S13.** HMBC spectrum of compound **2** (600 MHz, MeOD).

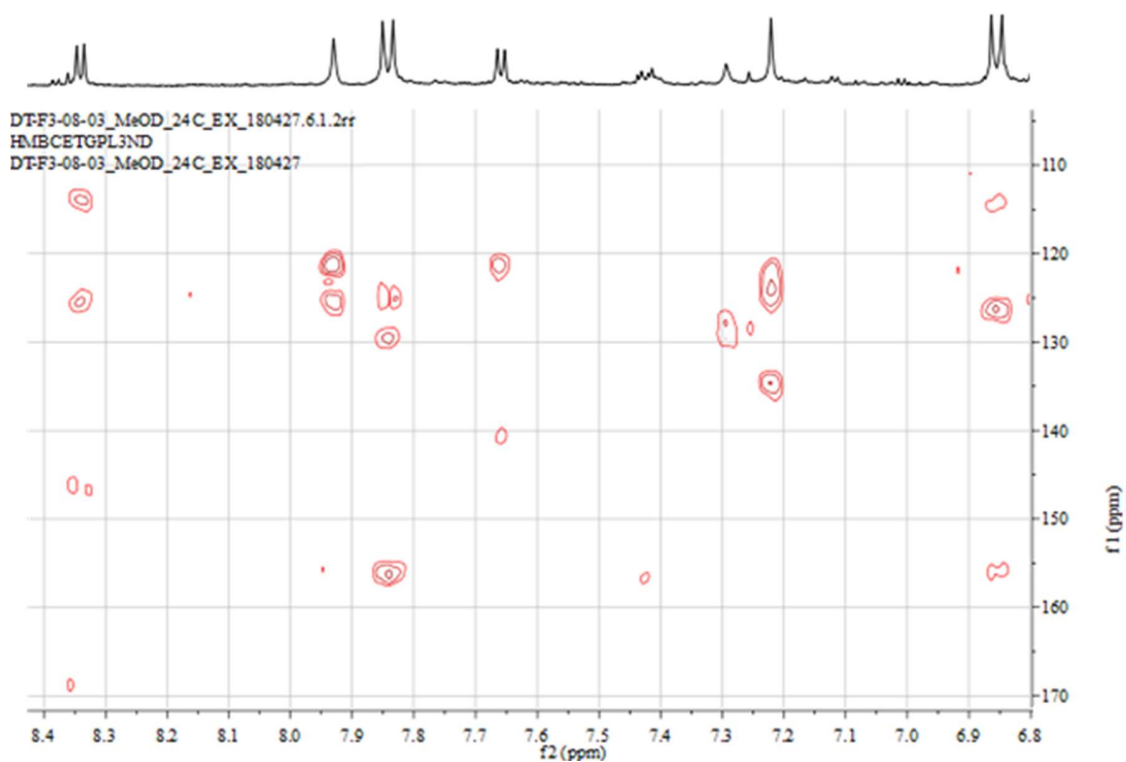

**Figure S14.** HMBC spectrum of compound **2** (500 MHz, MeOD).

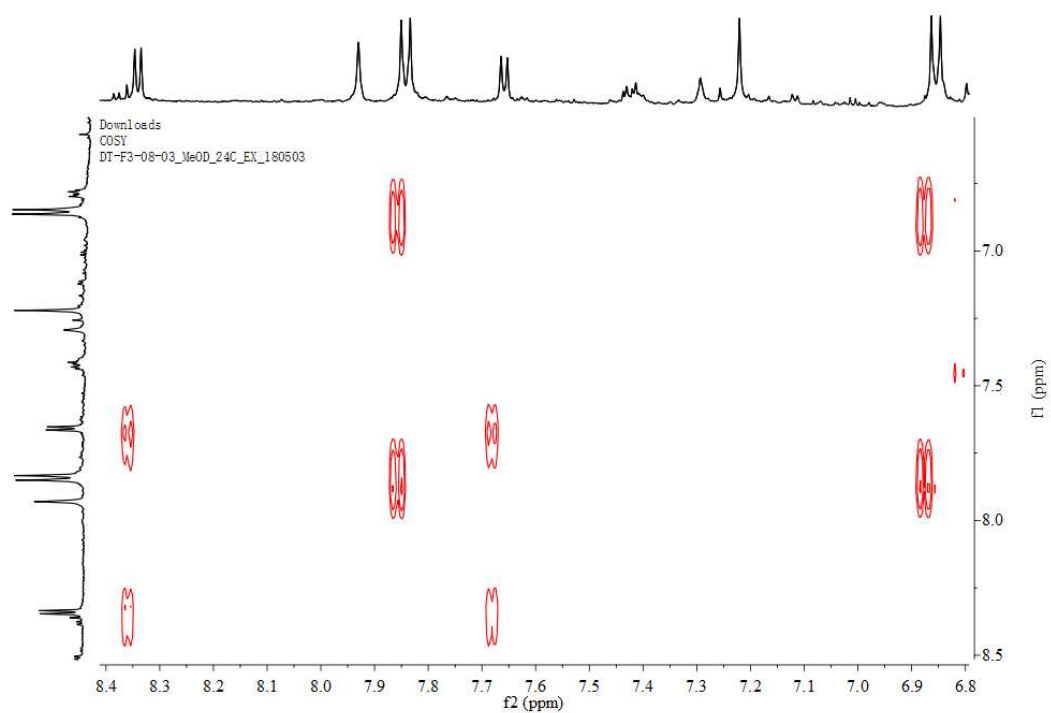

**Figure S15.** COSY spectrum of compound **2** (500 MHz, MeOD).

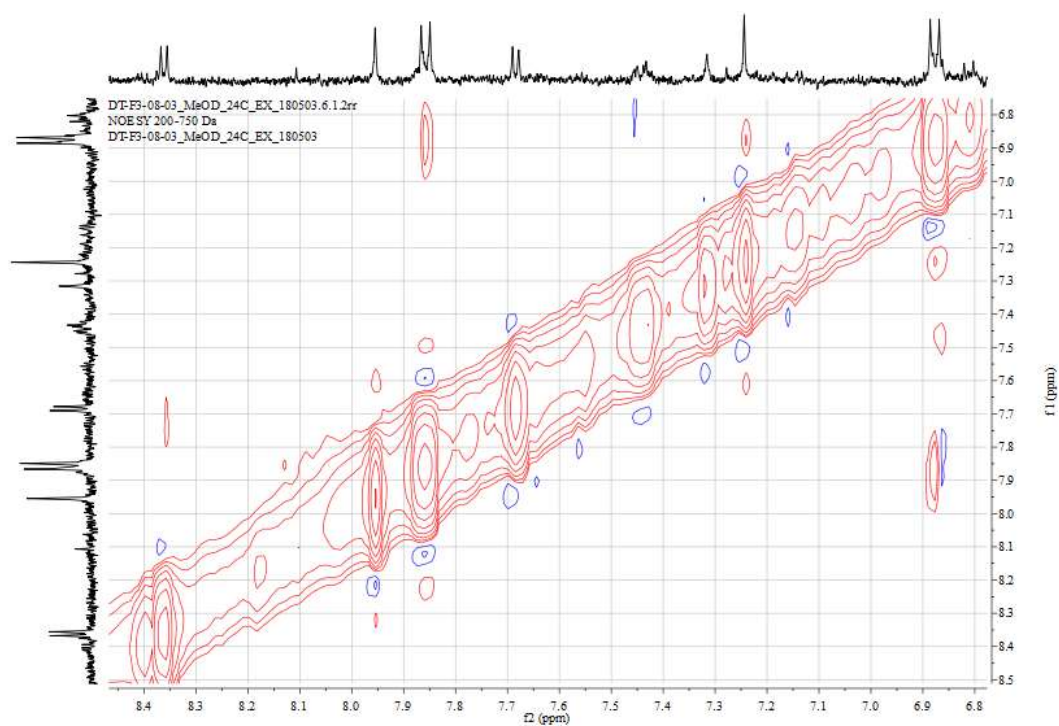

**Figure S16.** NOESY spectrum of compound **2** (500 MHz, MeOD).

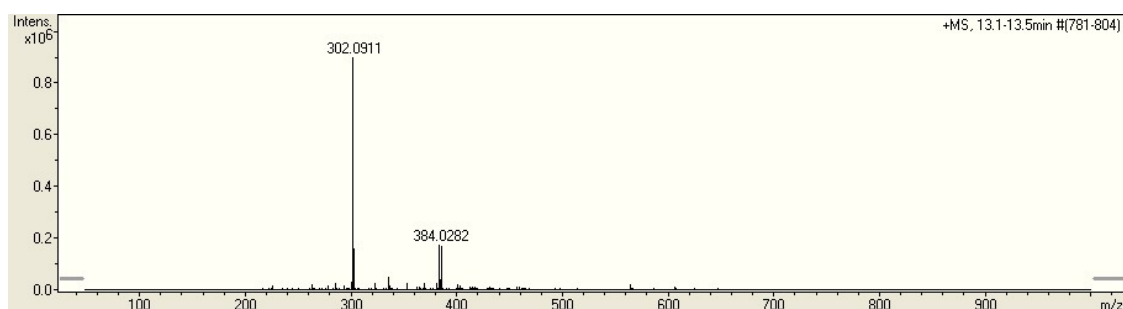

**Figure S17.** HR-ESIMS spectrum of compound 2.

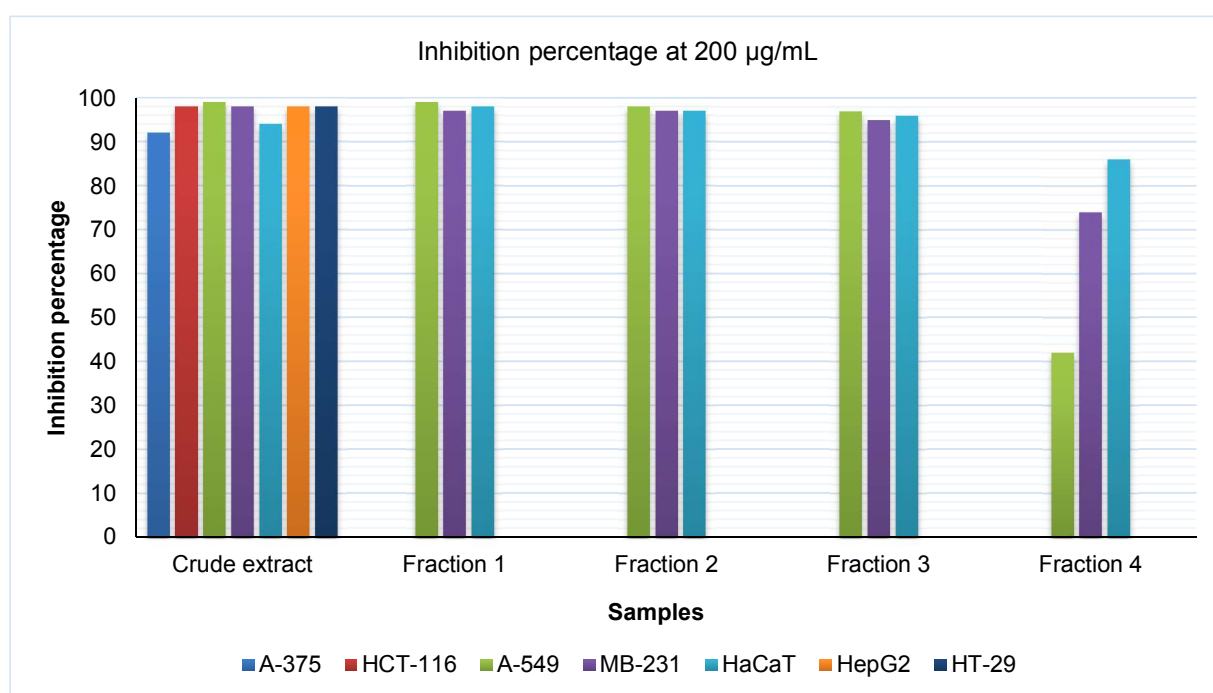

**Figure S18.** In vitro activity of crude *Latrunculia* extract and its SPE fractions against cancer cell lines. Test concentration: 200 µg/mL. Because of limited amounts available, fraction 5 was not tested against any cell lines while the other 4 fractions were tested only against three cancer cell lines.
